# Supplementary material for: Tumor Infiltrating Neutrophils Are Enriched in Basal-Type Urothelial Bladder Cancer
Source: MDPI journal article supplement (doi:10.3390/cells9020291), 2020-01-25
Supplement: s1 [file s1]

# Tumor infiltrating neutrophils are enriched in basal-type urothelial bladder cancer

Giulio Eugenio Mandelli <sup>1,†</sup>, Francesco Missale <sup>1,2,3,†</sup>, Debora Bresciani <sup>1</sup>, Luisa Benerini Gatta <sup>1,4</sup>, Patrizia Scapini <sup>5</sup>, Elena Caveggion <sup>5</sup>, Elisa Roca <sup>4,6</sup>, Mattia Bugatti <sup>1,6</sup>, Matilde Monti <sup>1</sup>, Luca Cristinelli <sup>4,6</sup>, Sandra Belotti <sup>4,6</sup>, Claudio Simeone <sup>4,6</sup>, Stefano Calza <sup>1</sup>, Laura Melocchi <sup>7</sup> and William Vermi <sup>1,6,8\*</sup>

<sup>1</sup> Department of Molecular and Translational Medicine, School of Medicine, University of Brescia, 25100 Brescia, Italy

<sup>2</sup> IRCCS Ospedale Policlinico San Martino, 16121 Genova, Italy

<sup>3</sup> Department of Otorhinolaryngology, Head and Neck Surgery—University of Genoa, 16121 Genova, Italy

<sup>4</sup> Department of Medical and Surgical Specialties, Radiological Sciences, and Public Health, University of Brescia, 25100 Brescia, Italy

<sup>5</sup> Section of General Pathology, Department of Medicine, University of Verona, Verona, Italy

<sup>6</sup> ASST Spedali Civili di Brescia, 25100 Brescia, Italy

<sup>7</sup> Department of Pathology, Fondazione Poliambulanza, 25100 Brescia, Italy

<sup>8</sup> Department of Pathology and Immunology, Washington University School of Medicine, St. Louis, MO 63130, USA

## Supplementary Figures

**Supplementary Figure 1** shows HR estimate and 95% CI for OS and PFS

**Supplementary Figure 2** shows hierarchical clustering and gene expression heatmaps of the neutrophil gene signature (TCGA dataset)

**Supplementary Figure 3** shows hierarchical clustering and gene expression heatmaps of the neutrophil gene signature (GSE32894 dataset)

**Supplementary Figure 4** shows hierarchical clustering and gene expression heatmaps of the neutrophil gene signature (GSE124305 dataset)

**Supplementary Figure 5** shows hierarchical clustering and gene expression heatmaps of the chemokine gene signature (TCGA dataset)

**Supplementary Figure 6** shows hierarchical clustering and gene expression heatmaps of the chemokine gene signature (GSE32894 dataset)

**Supplementary Figure 7** shows hierarchical clustering and gene expression heatmaps of the chemokine gene signature (GSE124305 dataset)

**Supplementary Figure 8** display a Waterfall Plot comparing Basal/Luminal Infiltrated vs Luminal subtype for every Chemokine (TCGA dataset)

**Supplementary Figure 9** display a Waterfall Plot comparing Basal/Infiltrated vs Luminal subtype for every Chemokine (GSE32894 dataset)

**Supplementary Figure 10** display a Waterfall Plot comparing Basal/Immune vs Luminal subtype for every Chemokine (GSE124305 dataset)

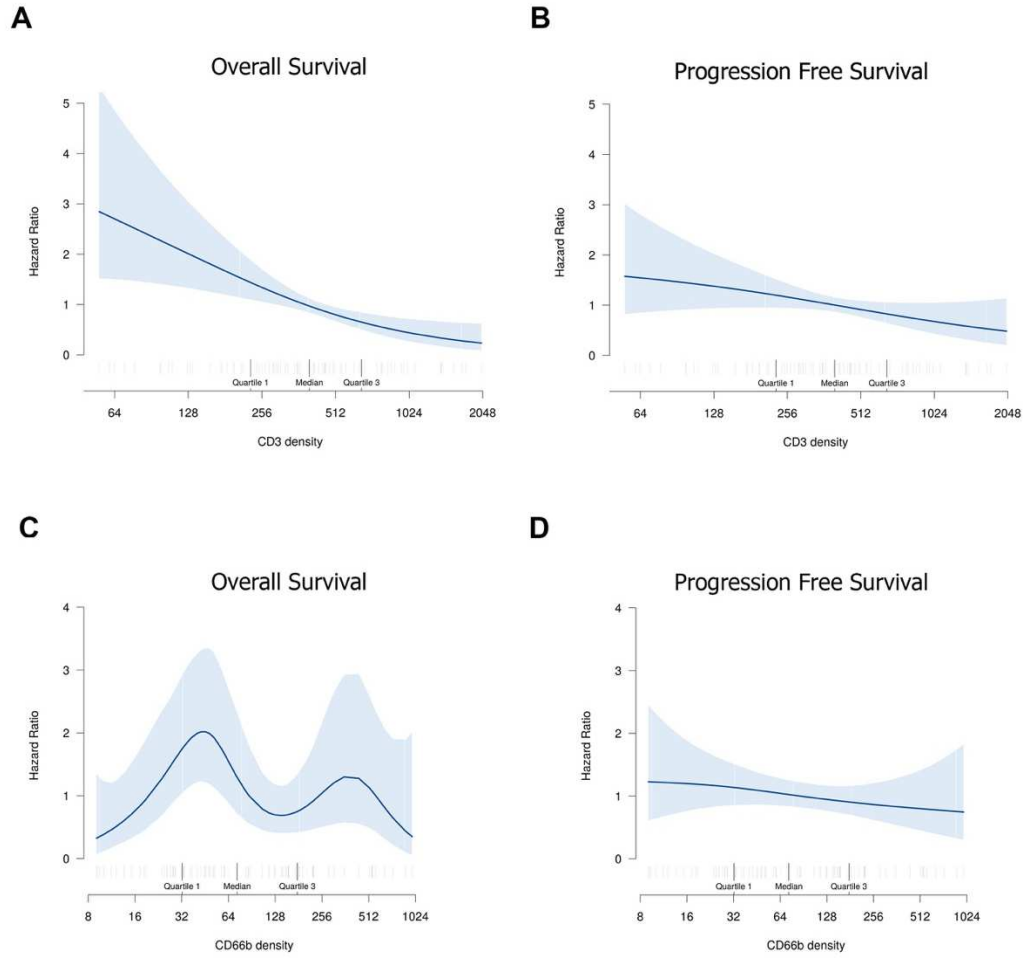

**Supplementary Figure 1.** HR estimate (dark line) and 95% CI (dashed area) for OS and PFS according to CD3<sup>+</sup> T cell density (**A** and **B**) and CD66b<sup>+</sup> TAN density (**B** and **C**), modelled by penalized splines. Reference for HR estimate: mean risk of the whole cohort.

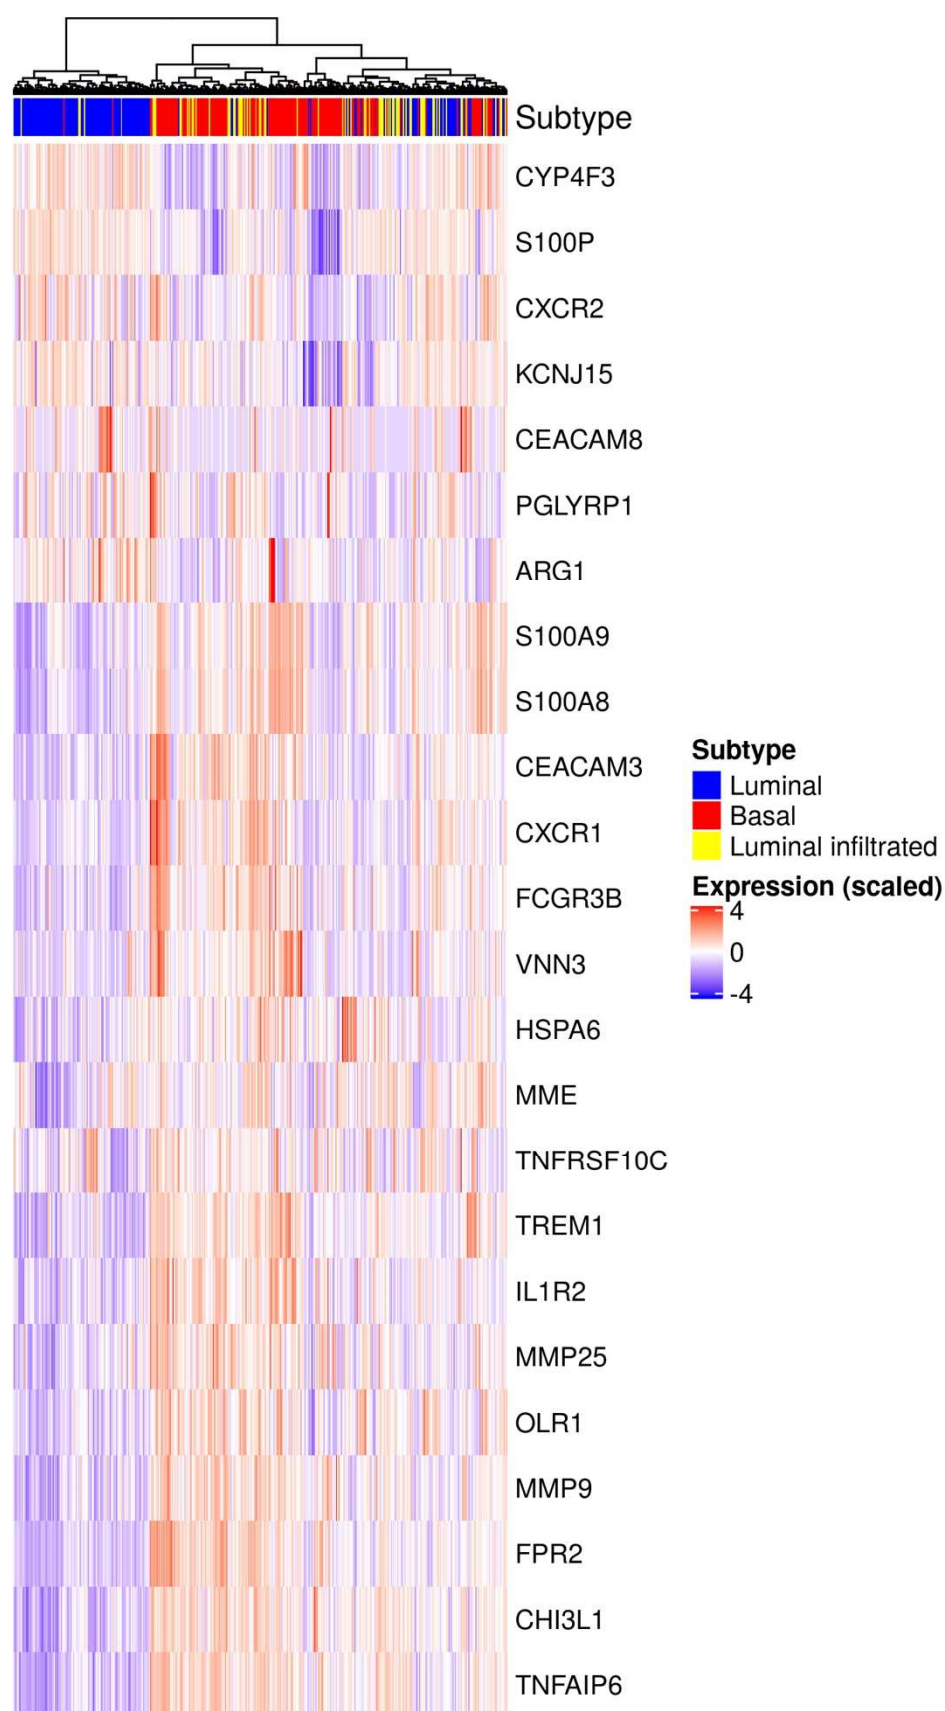

**Supplementary Figure 2.** Hierarchical clustering with gene expression heatmaps for TCGA dataset considering the neutrophil gene signature. Gene-level dendrograms were computed using Euclidean distance while sample-level clustering was based on random forest derived proximity matrix. Both clustering used Ward algorithm. Gene expression values were scaled and mean centered.

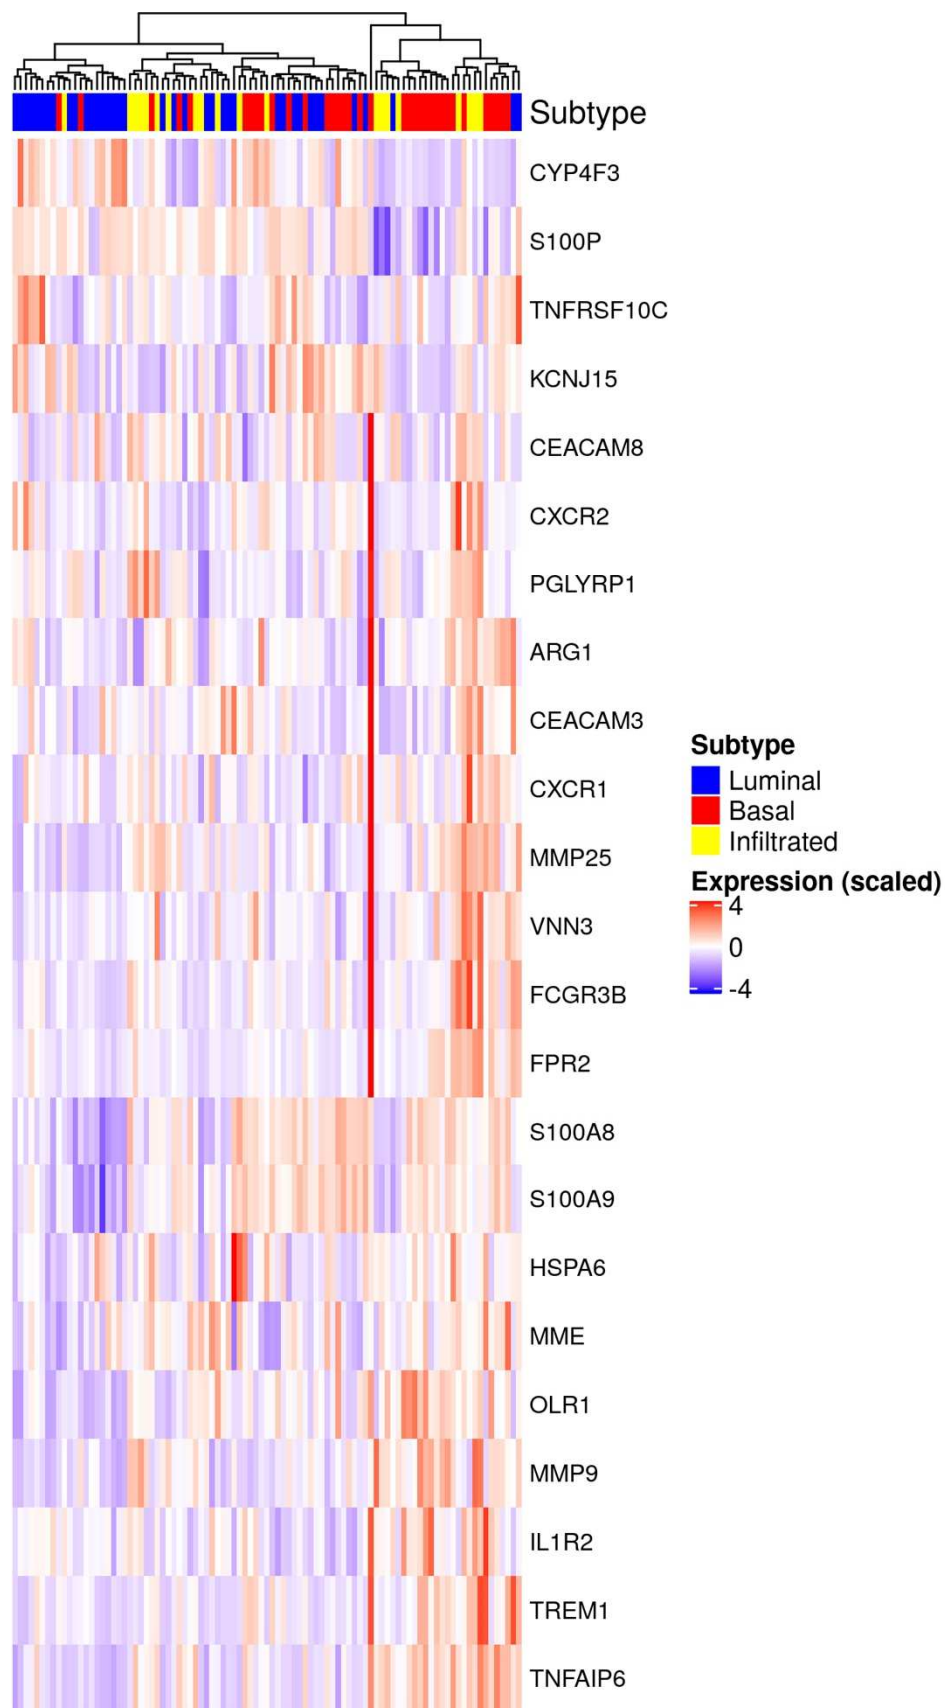

**Supplementary Figure 3.** Hierarchical clustering with gene expression heatmaps for GSE32894 dataset considering the neutrophil gene signature. Gene-level dendrograms were computed using Euclidean distance while sample-level clustering was based on random forest derived proximity matrix. Both clustering used Ward algorithm. Gene expression values were scaled and mean centered.

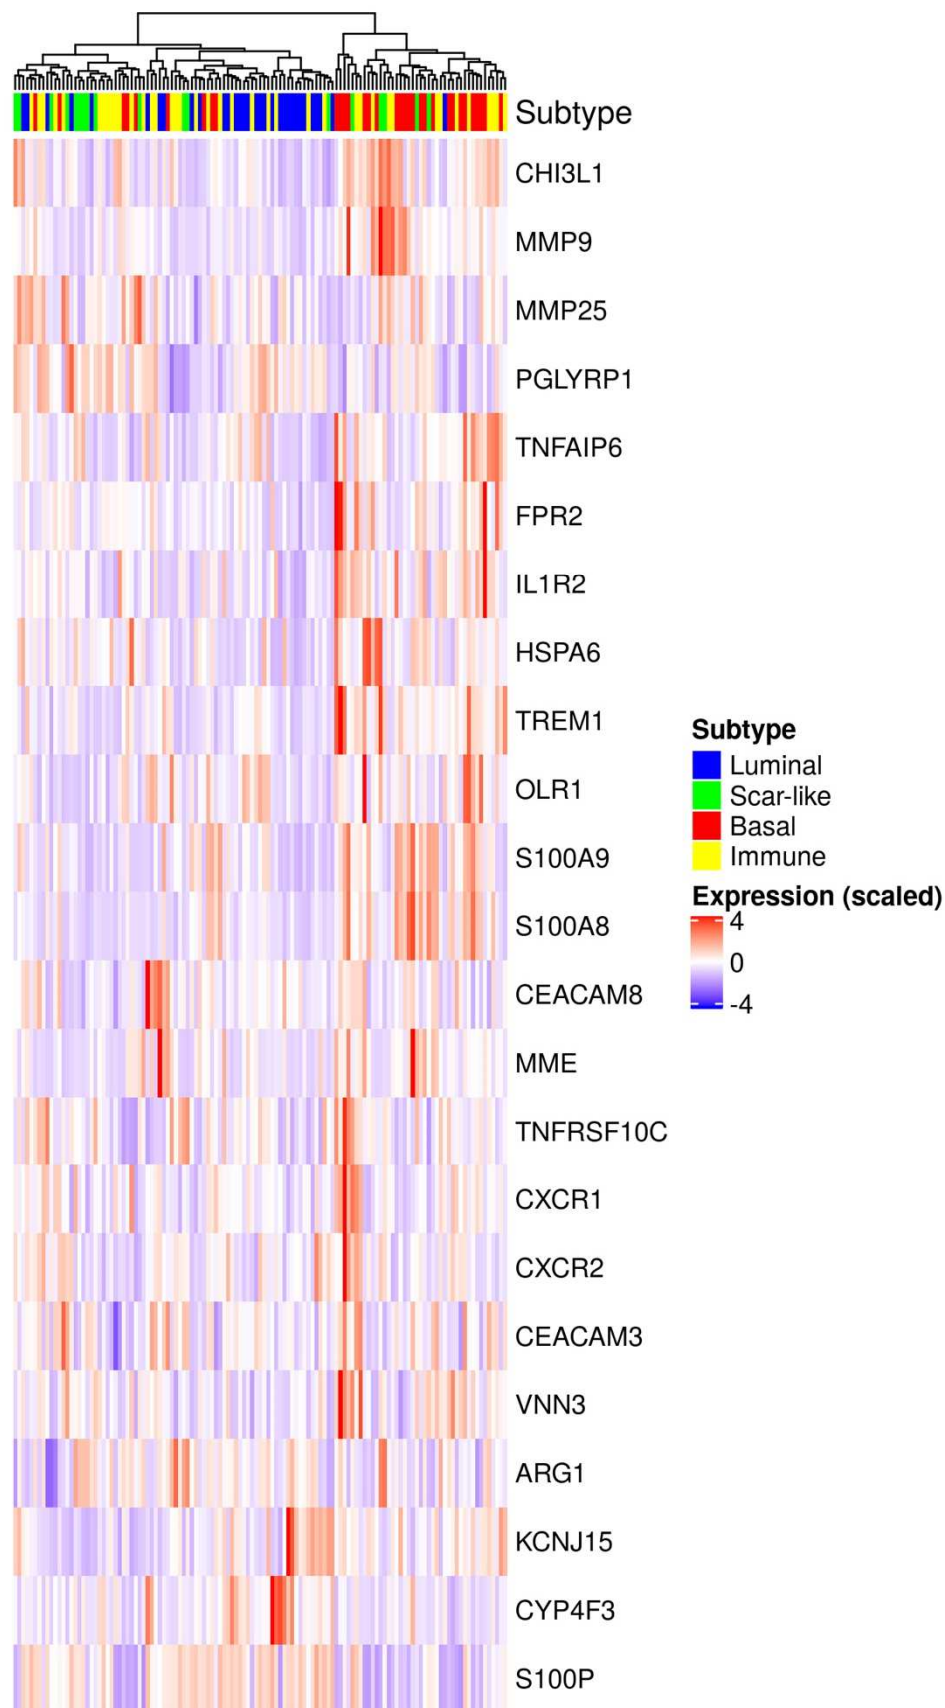

**Supplementary Figure 4.** Hierarchical clustering with gene expression heatmaps for GSE124305 dataset considering the neutrophil gene signature. Gene-level dendrograms were computed using Euclidean distance while sample-level clustering was based on random forest derived proximity matrix. Both clustering used Ward algorithm. Gene expression values were scaled and mean centered.

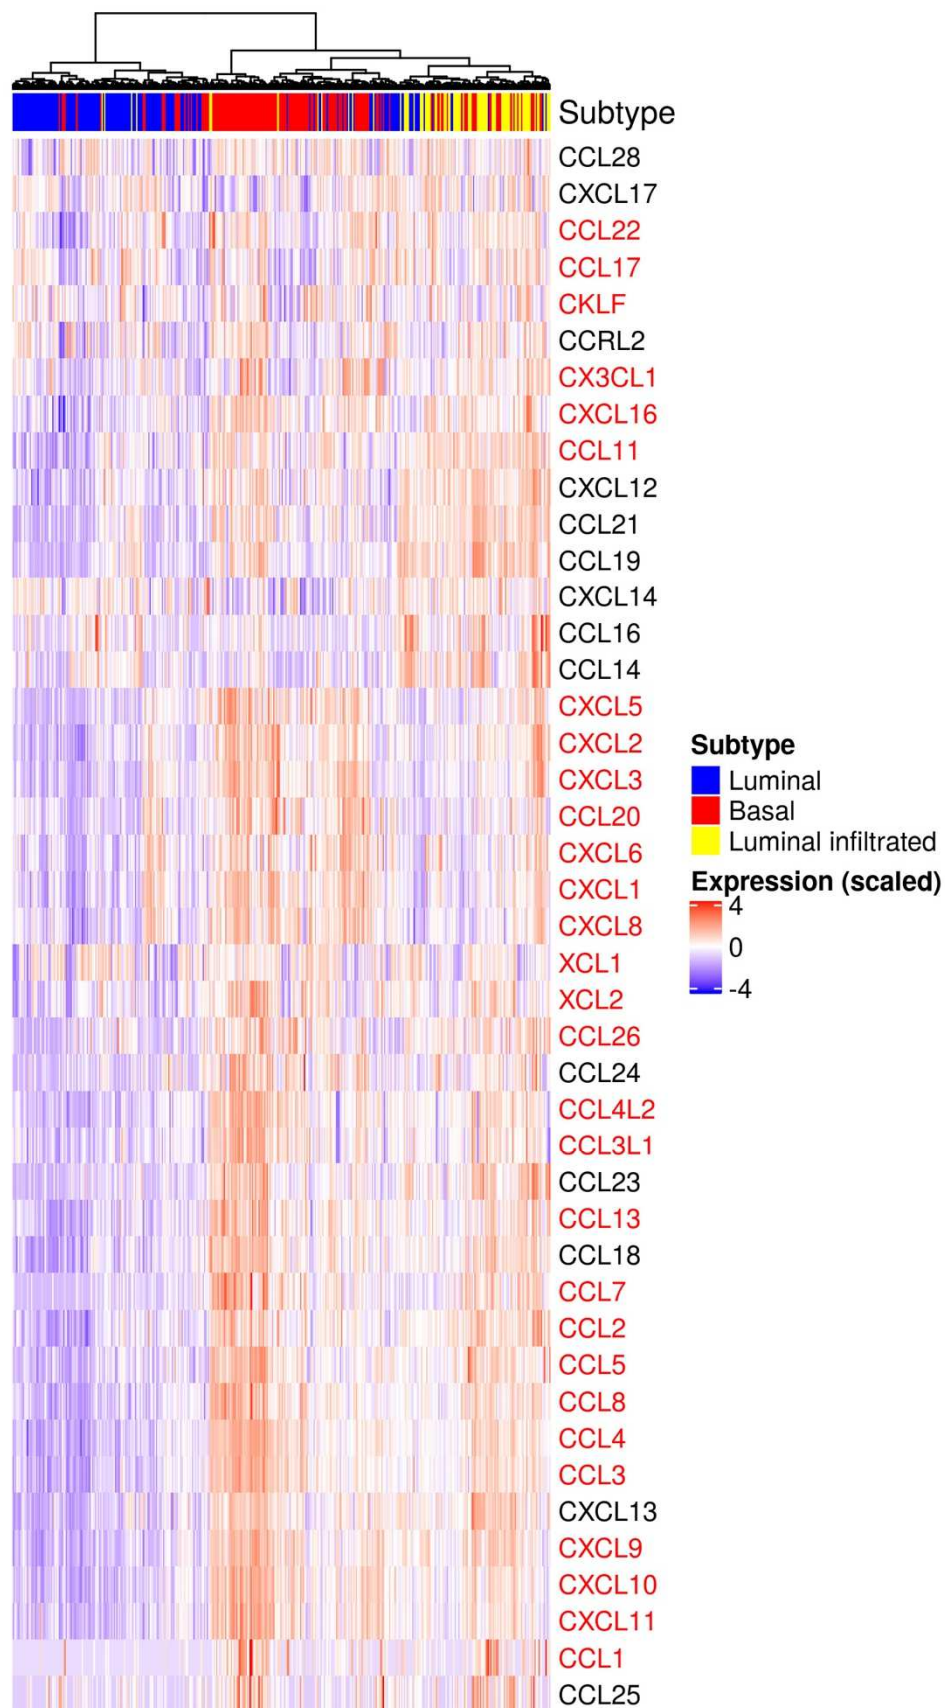

**Supplementary Figure 5.** Hierarchical clustering with gene expression heatmaps for TCGA dataset considering the chemokine gene signature. Both gene-level and sample-level dendrograms were computed using Euclidean distance and Ward algorithm. Gene expression values were scaled and mean centered. Chemokines with pro-inflammatory functions are labeled in red.

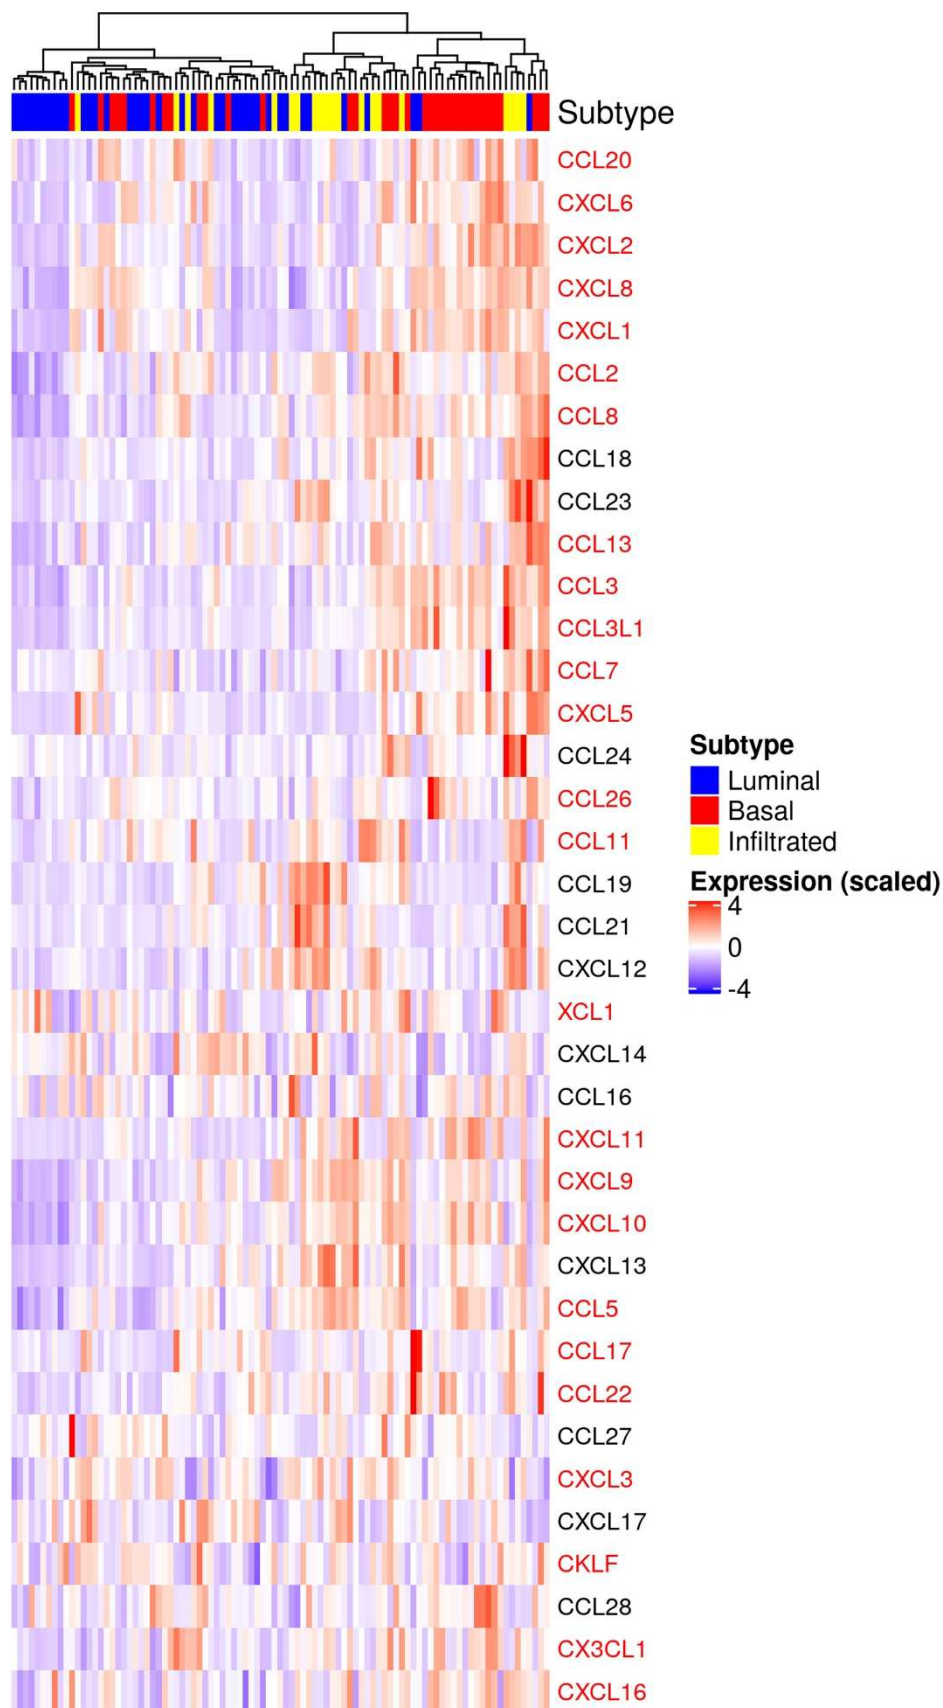

**Supplementary Figure 6.** Hierarchical clustering with gene expression heatmaps for GSE32894 dataset considering the chemokine gene signature. Both gene-level and sample-level dendrograms were computed using Euclidean distance and Ward algorithm. Gene expression values were scaled and mean centered. Chemokines with pro-inflammatory functions are labeled in red.

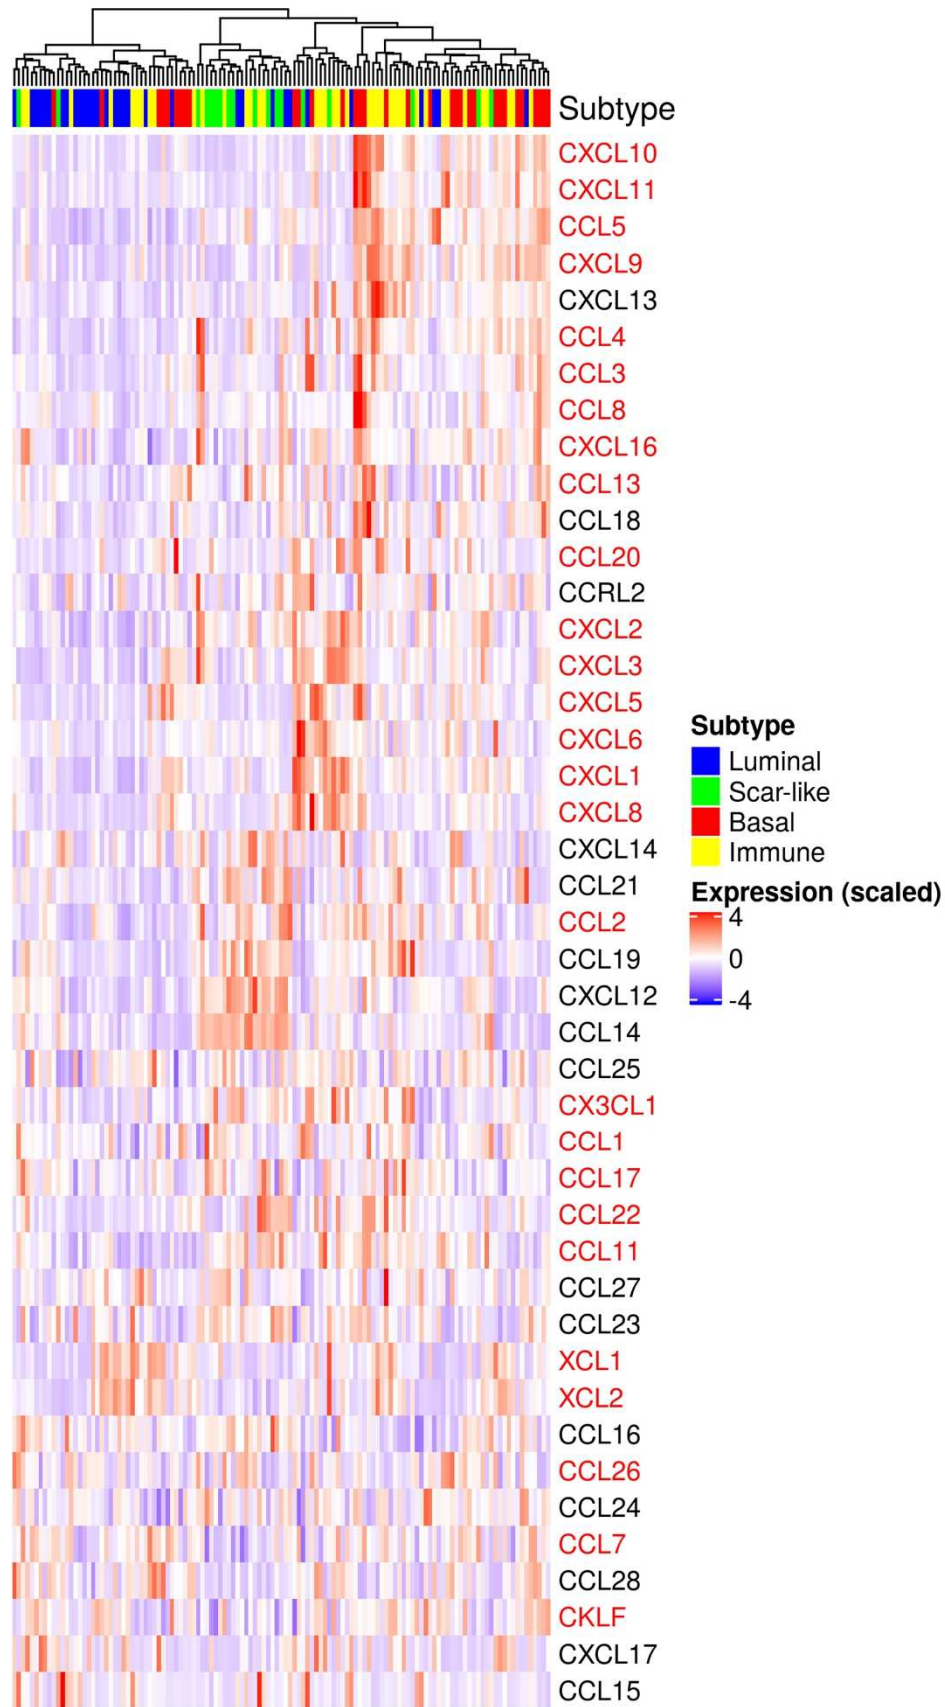

**Supplementary Figure 7.** Hierarchical clustering with gene expression heatmaps for GSE124305 dataset considering the chemokine gene signature. Both gene-level and sample-level dendrograms were computed using Euclidean distance and Ward algorithm. Gene expression values were scaled and mean centered. Chemokines with pro-inflammatory functions are labeled in red.

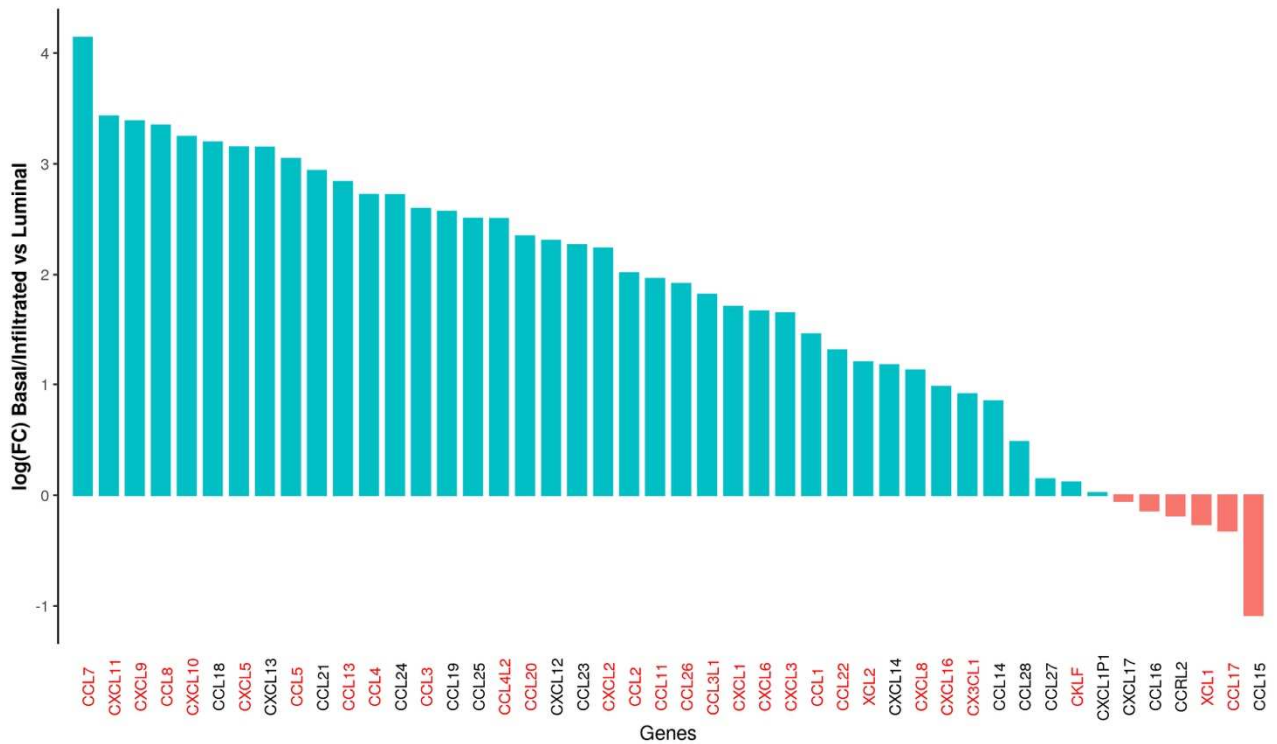

**Supplementary Figure 8.** Waterfall plots showing Fold Change values (on log<sub>2</sub> scale) comparing Basal/Infiltrated vs Luminal subtype for every Chemokine of the signature in TCGA dataset. Chemokines with pro-inflammatory functions are labeled in red.

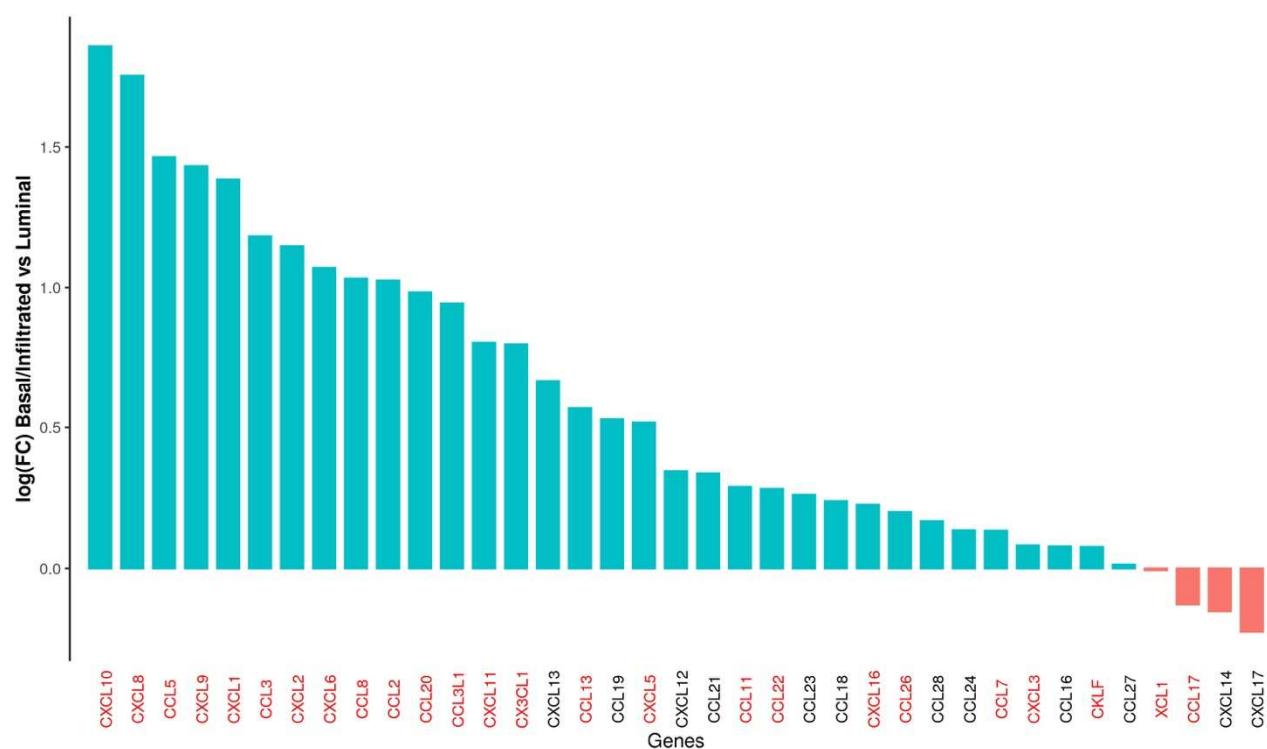

**Supplementary Figure 9.** Waterfall plots showing Fold Change values (on log<sub>2</sub> scale) comparing Basal/Infiltrated vs Luminal subtype for every Chemokine of the signature in GSE32894 dataset. Chemokines with pro-inflammatory functions are labeled in red.

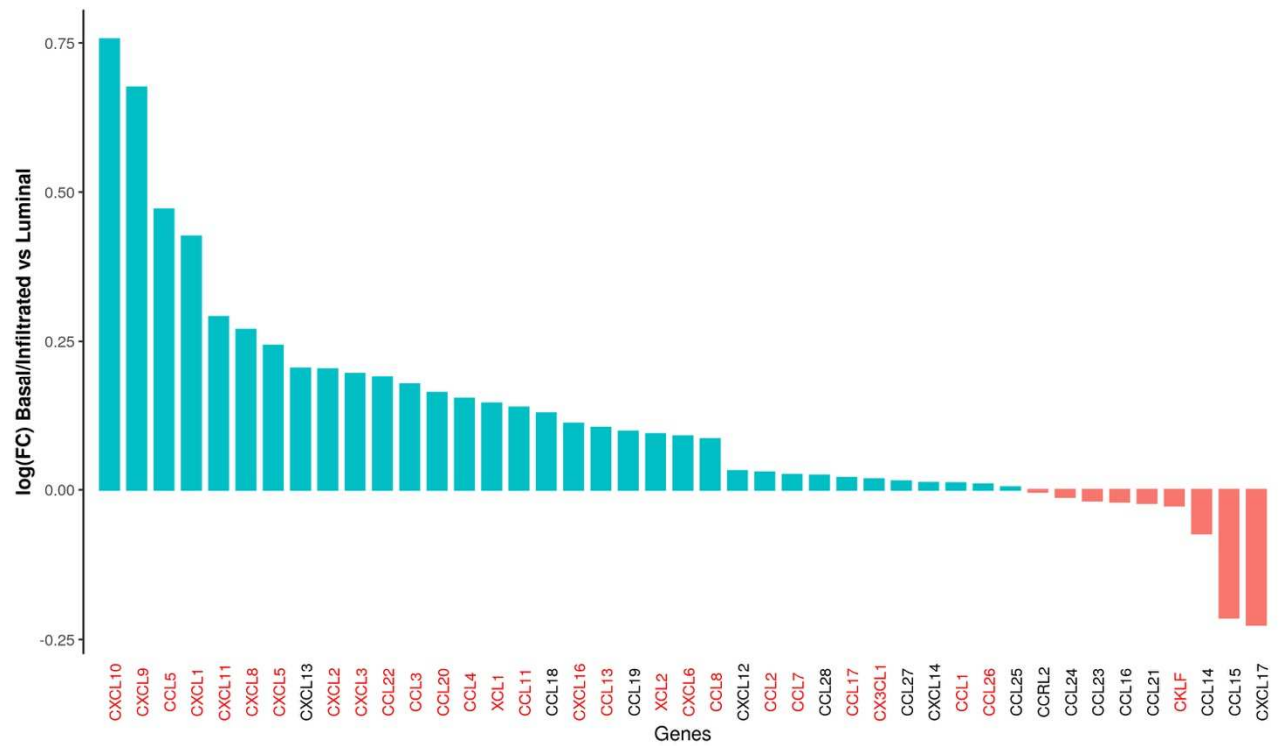

**Supplementary Figure 10.** Waterfall plots showing Fold Change values (on log<sub>2</sub> scale) comparing Basal/Infiltrated vs Luminal subtype for every Chemokine of the signature in GSE124305 dataset. Chemokines with pro-inflammatory functions are labeled in red.
