# Supplementary material for: Tumor Infiltrating Neutrophils Are Enriched in Basal-Type Urothelial Bladder Cancer
Source: MDPI journal article supplement (doi:10.3390/cells9020291), 2020-01-25
Supplement: s1 [file s1]

# Tumor infiltrating neutrophils are enriched in basal-type urothelial bladder cancer

Giulio Eugenio Mandelli <sup>1,†</sup>, Francesco Missale <sup>1,2,3,†</sup>, Debora Bresciani <sup>1</sup>, Luisa Benerini Gatta <sup>1,4</sup>, Patrizia Scapini <sup>5</sup>, Elena Caveggion <sup>5</sup>, Elisa Roca <sup>4,6</sup>, Mattia Bugatti <sup>1,6</sup>, Matilde Monti <sup>1</sup>, Luca Cristinelli <sup>4,6</sup>, Sandra Belotti <sup>4,6</sup>, Claudio Simeone <sup>4,6</sup>, Stefano Calza <sup>1</sup>, Laura Melocchi <sup>7</sup> and William Vermi <sup>1,6,8\*</sup>

<sup>1</sup> Department of Molecular and Translational Medicine, School of Medicine, University of Brescia, 25100 Brescia, Italy

<sup>2</sup> IRCCS Ospedale Policlinico San Martino, 16121 Genova, Italy

<sup>3</sup> Department of Otorhinolaryngology, Head and Neck Surgery—University of Genoa, 16121 Genova, Italy

<sup>4</sup> Department of Medical and Surgical Specialties, Radiological Sciences, and Public Health, University of Brescia, 25100 Brescia, Italy

<sup>5</sup> Section of General Pathology, Department of Medicine, University of Verona, Verona, Italy

<sup>6</sup> ASST Spedali Civili di Brescia, 25100 Brescia, Italy

<sup>7</sup> Department of Pathology, Fondazione Poliambulanza, 25100 Brescia, Italy

<sup>8</sup> Department of Pathology and Immunology, Washington University School of Medicine, St. Louis, MO 63130, USA

\* Correspondence: [william.vermi@unibs.it](mailto:william.vermi@unibs.it); Tel.: +39-030-399-8425

† These authors equally contributed to the work.

## Supplementary Tables

**Supplementary Table S1** reports the details of clinical and pathology data of the retrospective MIBC cohort.

**Supplementary Table S2** reports the details of reagents for the Gene Expression Assay on UBC lines.

**Supplementary Table S3:** reports the neutrophil and chemokine signatures used for Analysis of the TCGA, GSE32894 and GSE124305 Datasets.

**Supplementary Table S4** reports summary statistics of CD3 and CD66b as continuous variable, p values by Shapiro-Wilk normality test.

**Supplementary Table S1.** Details of clinical data of the retrospective MIBC cohort.

| ID | Density<br>CD66B<br>(cell/mm <sup>2</sup> ) | Density<br>CD3<br>(cell/mm <sup>2</sup> ) | Immunoscore | Age | Gender | pT  | pN | CIS | STAGE | PFS<br>cens<br>(1=years<br>0=no) | PFS<br>time<br>(months) | Status:<br>(1=Died<br>0=Alive) | OS<br>time | pSTAT<br>3 | pSTAT<br>3 HiLo | Subtype  | FOSL<br>1 |
|----|---------------------------------------------|-------------------------------------------|-------------|-----|--------|-----|----|-----|-------|----------------------------------|-------------------------|--------------------------------|------------|------------|-----------------|----------|-----------|
| 1  | 148,9                                       | 1376,0                                    | 3_HiHi      | 51  | M      | T2a | N0 | 0   | 2     | 0                                | 108                     | 0                              | 108        | 2          | Hi              | Luminal  |           |
| 2  | 732,3                                       | 248,9                                     | 1_3LoHi     | 68  | M      | T2b | N0 | 0   | 2     | 0                                | 92                      | 1                              | 92         | 3          | Hi              | Basal    | 3         |
| 3  | 282,5                                       | 788,4                                     | 3_HiHi      | 82  | M      | T4  | N0 | 0   | 3     | 0                                | 89                      | 1                              | 89         | 3          | Hi              | Basal    | 3         |
| 4  | 975,6                                       | 2020,8                                    | 3_HiHi      | 73  | M      | T3b | N0 | 0   | 3     | 1                                | 84                      | 0                              | 108        | 3          | Hi              | Basal    | 2         |
| 5  | 86,2                                        | 788,2                                     | 3_HiHi      | 68  | M      | T3b | N1 | 1   | 4     | 0                                | 108                     | 0                              | 108        | 1          | Lo              | Luminal  |           |
| 6  | 60,2                                        | 288,8                                     | 2_3HiLo     | 57  | M      | T2b | N0 | 1   | 2     | 0                                | 96                      | 0                              | 96         | 2          | Hi              | Non-type |           |
| 7  | 225,4                                       | 1385,3                                    | 3_HiHi      | 52  | M      | T2b | N0 | 0   | 2     | 0                                | 101                     | 0                              | 101        | 1          | Lo              | Basal    | 3         |
| 8  | 32,7                                        | 1557,8                                    | 2_3HiLo     | 78  | M      | T3a | N0 | 1   | 3     | 0                                | 96                      | 0                              | 96         | 3          | Hi              | Non-type |           |
| 9  | 143,5                                       | 400,2                                     | 3_HiHi      | 73  | M      | T3a | N0 | 1   | 3     | 0                                | 96                      | 0                              | 96         | 3          | Hi              | basal    | 2         |
| 10 | 105,9                                       | 60,9                                      | 1_3LoHi     | 54  | F      | T2b | N0 | 1   | 2     | 0                                | 84                      | 0                              | 84         | 2          | Hi              | luminal  | 1         |
| 11 | 1048,9                                      | 467,9                                     | 3_HiHi      | 78  | M      | T3a | N0 | 1   | 3     | 0                                | 84                      | 0                              | 84         | 2          | Hi              | Non-type |           |
| 12 | 156,3                                       | 536,7                                     | 3_HiHi      | 70  | F      | T2b | N0 | 1   | 2     | 0                                | 84                      | 0                              | 84         | 2          | Hi              | Luminal  | 1         |
| 13 | 139,9                                       | 327,1                                     | 3_HiHi      | 61  | M      | T2b | N0 | 1   | 2     | 0                                | 72                      | 0                              | 72         | 3          | Hi              | Basal    | 3         |
| 14 | 155,2                                       | 638,2                                     | 3_HiHi      | 69  | M      | T2  | N0 | 1   | 2     | 0                                | 72                      | 0                              | 72         | 2          | Hi              | Basal    | 3         |
| 15 | 31,7                                        | 400,6                                     | 2_3HiLo     | 71  | M      | T2b | N0 | 0   | 2     | 0                                | 54                      | 0                              | 54         | 1          | Lo              | Luminal  | 2         |
| 16 | 86,0                                        | 1745,1                                    | 3_HiHi      | 76  | M      | T3  | N0 | 0   | 3     | 0                                | 60                      | 0                              | 60         | 1          | Lo              | Non-type |           |
| 17 | 17,3                                        | 453,1                                     | 2_3HiLo     | 69  | M      | T3a | N0 | 0   | 3     | 0                                | 36                      | 0                              | 36         | 0          | Lo              | Non-type |           |
| 18 | 117,2                                       | 348,8                                     | 3_HiHi      | 50  | M      | T4a | N0 | 1   | 3     | 0                                | 36                      | 0                              | 36         | 1          | Lo              | Non-type | 1         |
| 19 | 356,0                                       | 263,5                                     | 1_3LoHi     | 65  | M      | T4  | N0 | 0   | 3     | 1                                | 3                       | 1                              | 14         | 3          | Hi              | Basal    | 3         |
| 20 | 12,1                                        | 27,3                                      | 0_LoLo      | 73  | M      | T3b | N2 | 1   | 4     | 1                                | 1                       | 1                              | 50         | 1          | Lo              | Non-type |           |
| 21 | 172,6                                       | 892,8                                     | 3_HiHi      | 90  | F      | T2b | N0 | 0   | 2     | 0                                | 65                      | 1                              | 65         | 3          | Hi              | Basal    | 3         |
| 22 | 11,2                                        | 214,4                                     | 0_LoLo      | 57  | M      | T3a | N0 | 0   | 3     | 1                                | 20                      | 1                              | 25         | 2          | Hi              | Non-type |           |
| 23 | 9,2                                         | 671,7                                     | 2_3HiLo     | 75  | M      | T3a | N1 | 1   | 4     | 1                                | 18                      | 0                              | 132        | 1          | Lo              | Luminal  | 0         |
| 24 | 47,9                                        | 461,5                                     | 2_3HiLo     | 80  | F      | T2b | N1 | 1   | 4     | 1                                | 2                       | 1                              | 4          | 2          | Hi              | Luminal  | 0         |
| 25 | 10,1                                        | 283,4                                     | 0_LoLo      | 60  | M      | T3a | N0 | 1   | 3     | 1                                | 9                       | 1                              | 10         | 2          | Hi              | Non-type |           |
| 26 | 25,6                                        | 564,3                                     | 2_3HiLo     | 65  | M      | T2b | N0 | 1   | 2     | 0                                | 85                      | 1                              | 85         | 1          | Lo              | Luminal  |           |
| 27 | 127,4                                       | 436,0                                     | 3_HiHi      | 76  | M      | T3a | N1 | 1   | 4     | 1                                | 51                      | 1                              | 92         | 1          | Lo              | Luminal  | 1         |
| 28 | 223,7                                       | 357,5                                     | 3_HiHi      | 65  | M      | T2a | N0 | 1   | 2     | 1                                | 38                      | 0                              | 91         | 1          | Lo              | Luminal  |           |
| 29 | 18,3                                        | 98,2                                      | 0_LoLo      | 58  | M      | T3a | N0 | 0   | 3     | 1                                | 5                       | 1                              | 7          | 3          | Hi              | Basal    | 3         |
| 30 | 60,0                                        | 464,3                                     | 2_3HiLo     | 86  | F      | T3b | N0 | 0   | 3     | 1                                | 16                      | 1                              | 27         | 3          | Hi              | Basal    | 0         |
| 31 | 565,8                                       | 418,2                                     | 3_HiHi      | 62  | M      | T4  | N0 | 1   | 3     | 1                                | 9                       | 0                              | 72         | 1          | Lo              | Luminal  | 0         |
| 32 | 48,7                                        | 484,2                                     | 2_3HiLo     | 70  | M      | T2b | N0 | 1   | 2     | 1                                | 4                       | 0                              | 68         | 1          | Lo              | Luminal  |           |

|        |       |        |         |    |   |     |    |   |   |   |    |   |    |   |    |          |   |
|--------|-------|--------|---------|----|---|-----|----|---|---|---|----|---|----|---|----|----------|---|
| 3<br>3 | 24,8  | 397,2  | 2_3HiLo | 68 | M | T3a | N2 | 0 | 4 | 1 | 1  | 1 | 11 | 2 | Hi | Non-type |   |
| 3<br>4 | 15,2  | 196,8  | 0_LoLo  | 59 | M | T2a | N0 | 0 | 2 | 1 | 4  | 0 | 47 | 1 | Lo | Lumina I | 1 |
| 3<br>5 | 307,5 | 462,8  | 3_HiHi  | 66 | M | T3a | N0 | 0 | 3 | 1 | 4  | 1 | 11 | 3 | Hi | Basal    | 3 |
| 3<br>6 | 71,7  | 975,7  | 2_3HiLo | 61 | M | T2b | N0 | 1 | 2 | 1 | 24 | 1 | 46 | 3 | Hi | Non-type |   |
| 3<br>7 | 154,9 | 507,7  | 3_HiHi  | 75 | M | T3b | N2 | 1 | 4 | 1 | 19 | 1 | 33 | 1 | Lo | Lumina I |   |
| 3<br>8 | 33,3  | 500,6  | 2_3HiLo | 81 | F | T3a | N3 | 1 | 4 | 1 | 10 | 1 | 35 | 1 | Lo | Lumina I | 0 |
| 3<br>9 | 32,8  | 63,8   | 0_LoLo  | 74 | M | T3a | N0 | 0 | 3 | 1 | 3  | 1 | 10 | 3 | Hi | Non-type |   |
| 4<br>0 | 40,5  | 230,3  | 0_LoLo  | 64 | M | T4b | N0 | 1 | 4 | 0 | 3  | 1 | 3  | 1 | Lo | Lumina I |   |
| 4<br>1 | 13,6  | 18,1   | 0_LoLo  | 73 | M | T4b | N0 | 1 | 4 | 0 | 7  | 1 | 7  | 0 | Lo | Non-type |   |
| 4<br>2 | 45,0  | 255,8  | 0_LoLo  | 82 | F | T4  | N1 | 1 | 4 | 1 | 3  | 1 | 11 | 1 | Lo | Lumina I |   |
| 4<br>3 | 28,3  | 274,3  | 0_LoLo  | 74 | M | T3a | N0 | 1 | 3 | 1 | 6  | 0 | 36 | 0 | Lo | Lumina I | 2 |
| 4<br>4 | 538,5 | 211,1  | 1_3LoHi | 70 | F | T3b | N2 | 0 | 4 | 0 | 2  | 1 | 2  | 2 | Hi | Non-type |   |
| 4<br>5 | 51,4  | 21,1   | 0_LoLo  | 61 | F | T3b | N1 | 1 | 4 | 1 | 4  | 1 | 9  | 1 | Lo | Lumina I | 0 |
| 4<br>6 | 537,3 | 544,1  | 3_HiHi  | 67 | M | T2  | N0 | 1 | 2 | 0 | 20 | 0 | 20 | 2 | Hi | Non-type |   |
| 4<br>7 | 57,9  | 801,2  | 2_3HiLo | 77 | M | T2a | N0 | 0 | 2 | 1 | 2  | 0 | 6  | 1 | Lo | Lumina I | 1 |
| 4<br>8 | 223,5 | 403,3  | 3_HiHi  | 84 | M | T3a | N0 | 1 | 3 | 0 | 24 | 0 | 24 | 1 | Lo | Non-type |   |
| 4<br>9 | 537,0 | 395,1  | 3_HiHi  | 65 | M | T2b | N1 | 0 | 4 | 0 | 24 | 0 | 24 | 2 | Hi | Basal    | 3 |
| 5<br>0 | 126,0 | 415,2  | 3_HiHi  | 81 | M | T4  | N0 | 1 | 3 | 1 | 6  | 1 | 11 | 3 | Hi | Non-type |   |
| 5<br>1 | 72,8  | 184,0  | 0_LoLo  | 85 | M | T3a | N2 | 1 | 4 | 1 | 3  | 1 | 6  | 2 | Hi | Basal    | 3 |
| 5<br>2 | 128,0 | 133,3  | 1_3LoHi | 76 | M | T3a | N1 | 0 | 4 | 1 | 6  | 1 | 19 | 1 | Lo | Non-type |   |
| 5<br>3 | 225,0 | 294,3  | 3_HiHi  | 82 | M | T3a | N0 | 1 | 3 | 1 | 4  | 0 | 9  | 1 | Lo | Lumina I |   |
| 5<br>4 | 28,1  | 756,3  | 2_3HiLo | 81 | F | T3a | N1 | 0 | 4 | 1 | 5  | 1 | 14 | 1 | Lo | Non-type |   |
| 5<br>5 | 25,8  | 110,3  | 0_LoLo  | 85 | M | T3a | N0 | 1 | 3 | 1 | 3  | 1 | 8  | 1 | Lo | Lumina I |   |
| 5<br>6 | 82,8  | 609,1  | 3_HiHi  | 65 | M | T2b | N0 | 0 | 2 | 0 | 16 | 0 | 16 | 2 | Hi | Lumina I |   |
| 5<br>7 | 29,2  | 654,4  | 2_3HiLo | 72 | M | T3a | N0 | 1 | 3 | 0 | 9  | 0 | 9  | 2 | Hi | Lumina I |   |
| 5<br>8 | 51,1  | 285,5  | 0_LoLo  | 47 | F | T4  | N0 | 0 | 3 | 1 | 1  | 1 | 4  | 3 | Hi | Basal    | 3 |
| 5<br>9 | 182,8 | 55,3   | 1_3LoHi | 85 | M | T4  | N1 | 1 | 4 | 0 | 10 | 0 | 10 | 2 | Hi | Basal    | 1 |
| 6<br>0 | 116,1 | 98,7   | 1_3LoHi | 81 | M | T4  | N0 | 1 | 3 | 0 | 9  | 0 | 9  | 1 | Lo | Non-type |   |
| 6<br>1 | 206,1 | 1686,7 | 3_HiHi  | 77 | M | T2a | N0 | 1 | 2 | 0 | 9  | 0 | 9  | 2 | Hi | Lumina I |   |
| 6<br>2 | 87,5  | 955,3  | 3_HiHi  | 83 | M | T2a | N0 | 1 | 2 | 0 | 7  | 0 | 7  | 1 | Lo | Lumina I |   |
| 6<br>3 | 887,3 | 1405,5 | 3_HiHi  | 87 | M | T2b | N0 | 1 | 2 | 0 | 7  | 0 | 7  | 2 | Hi | Non-type |   |
| 6<br>4 | 151,1 | 865,4  | 3_HiHi  | 74 | M | T3a | N0 | 0 | 3 | 0 | 5  | 0 | 5  | 3 | Hi | Basal    | 3 |
| 6<br>5 | 33,0  | 243,3  | 0_LoLo  | 72 | M | T2a | N1 | 1 | 4 | 0 | 4  | 0 | 4  | 3 | Hi | Lumina I | 1 |
| 6<br>6 | 52,1  | 319,6  | 2_3HiLo | 69 | M | T3a | N2 | 1 | 4 | 0 | 18 | 1 | 18 | 2 | Hi | Lumina I | 2 |
| 6<br>7 | 45,7  | 366,5  | 2_3HiLo | 79 | M | T3a | N1 | 0 | 4 | 0 | 1  | 1 | 1  | 1 | Lo | Non-type |   |

|        |       |        |         |    |   |     |    |   |   |   |    |   |    |   |    |              |   |
|--------|-------|--------|---------|----|---|-----|----|---|---|---|----|---|----|---|----|--------------|---|
| 6<br>8 | 27,1  | 1083,2 | 2_3HiLo | 72 | M | T2  | N0 | 1 | 2 | 0 | 8  | 0 | 8  | 0 | Lo | Lumina<br>I  | 1 |
| 6<br>9 | 9,0   | 298,1  | 2_3HiLo | 41 | F | T4a | N1 | 0 | 4 | 1 | 27 | 0 | 31 | 3 | Hi | Basal        | 2 |
| 7<br>0 | 442,5 | 1385,0 | 3_HiHi  | 85 | M | T4a | N0 | 0 | 3 | 0 | 8  | 1 | 8  | 1 | Lo | Basal        | 3 |
| 7<br>1 | 142,4 | 176,1  | 1_3LoHi | 80 | M | T3a | N1 | 0 | 4 | 0 | 8  | 1 | 8  | 1 | Lo | Lumina<br>I  | 0 |
| 7<br>2 | 192,7 | 356,9  | 3_HiHi  | 82 | F | T3a | N1 | 0 | 4 | 0 | 4  | 1 | 4  | 0 | Lo | Non-<br>type |   |
| 7<br>3 | 647,1 | 106,3  | 1_3LoHi | 54 | M | T3a | N0 | 1 | 3 | 1 | 3  | 0 | 24 | 0 | Lo | Lumina<br>I  | 1 |
| 7<br>4 | 155,8 | 1011,9 | 3_HiHi  | 66 | M | T3a | N2 | 1 | 4 | 1 | 3  | 0 | 17 | 0 | Lo | Lumina<br>I  | 2 |
| 7<br>5 | 23,8  | 174,0  | 0_LoLo  | 82 | M | T4  | N1 | 1 | 4 | 0 | 9  | 0 | 9  | 1 | Lo | Non-<br>type |   |
| 7<br>6 | 516,7 | 195,8  | 1_3LoHi | 79 | F | T3a | N0 | 0 | 3 | 1 | 2  | 1 | 3  | 3 | Hi | Basal        | 3 |
| 7<br>7 | 184,1 | 304,3  | 3_HiHi  | 50 | M | T4  | N0 | 0 | 3 | 1 | 1  | 0 | 9  | 1 | Lo | Lumina<br>I  |   |
| 7<br>8 | 36,2  | 70,1   | 0_LoLo  | 82 | F | T3a | N0 | 1 | 3 | 0 | 1  | 1 | 1  | 2 | Hi | Lumina<br>I  | 0 |
| 7<br>9 | 9,4   | 126,9  | 0_LoLo  | 79 | M | T3a | N0 | 1 | 3 | 0 | 6  | 0 | 6  | 1 | Lo | Lumina<br>I  |   |
| 8<br>0 | 18,7  | 157,0  | 0_LoLo  | 65 | M | T4  | N2 | 0 | 4 | 0 | 4  | 0 | 4  | 1 | Lo | Lumina<br>I  |   |
| 8<br>1 | 42,5  | 420,3  | 2_3HiLo | 65 | M | T4a | N2 | 1 | 4 | 1 | 1  | 1 | 4  | 2 | Hi | Lumina<br>I  | 1 |
| 8<br>2 | 29,1  | 130,0  | 0_LoLo  | 79 | M | T3a | N0 | 0 | 3 | 0 | 4  | 0 | 4  | 1 | Lo | Lumina<br>I  |   |
| 8<br>3 | 64,7  | 77,2   | 0_LoLo  | 71 | M | T4  | N0 | 1 | 3 | 0 | 3  | 1 | 3  | 0 | Lo | Lumina<br>I  |   |
| 8<br>4 | 37,3  | 837,0  | 2_3HiLo | 75 | F | T3a | N2 | 1 | 4 | 1 | 4  | 0 | 4  | 1 | Lo | Lumina<br>I  |   |

**Supplementary Table S2.** Reagents for gene expression assay on UBC lines.

| Gene   | Cat. no.       | Company                                      |
|--------|----------------|----------------------------------------------|
| CXCL1  | qHsaCEP0053391 | Bio-Rad                                      |
| CXCL2  | qHsaCEP0058163 | Bio-Rad                                      |
| CX3CL1 | qHsaCEP0049180 | Bio-Rad                                      |
| CXCL8  | qHsaCEP0053894 | Bio-Rad                                      |
| HPRT1  | 4333768T       | Applied Biosystems, Thermo Fisher Scientific |

**Supplementary Table S3:** genes defining the PMN and Chemokine signatures.

| Neutrophil signature |  | Chemokine signature |                        |
|----------------------|--|---------------------|------------------------|
|                      |  | Chemokine           | Inflammatory functions |
| ARG1                 |  | CCL14               | No                     |
| CEACAM3              |  | CCL15               | No                     |
| CEACAM8              |  | CCL16               | No                     |
| CHI3L1               |  | CCL18               | No                     |
| CXCR1                |  | CCL19               | No                     |
| CXCR2                |  | CCL21               | No                     |
| CYP4F3               |  | CCL23               | No                     |
| FCGR3B               |  | CCL24               | No                     |
| FPR2                 |  | CCL25               | No                     |
| HSPA6                |  | CCL27               | No                     |
| IL1R2                |  | CCL28               | No                     |
| KCNJ15               |  | CCRL2               | No                     |
| MME                  |  | CXCL12              | No                     |
| MMP9                 |  | CXCL13              | No                     |
| MMP25                |  | CXCL14              | No                     |
| OLR1                 |  | CXCL17              | No                     |
| PGLYRP1              |  | CCL1                | Yes                    |
| S100A8               |  | CCL11               | Yes                    |
| S100A9               |  | CCL13               | Yes                    |
| S100P                |  | CCL17               | Yes                    |
| TNFAIP6              |  | CCL2                | Yes                    |
| TNFRSF10C            |  | CCL20               | Yes                    |
| TREM1                |  | CCL22               | Yes                    |
| VNN3                 |  | CCL26               | Yes                    |
|                      |  | CCL3                | Yes                    |
|                      |  | CCL3L1              | Yes                    |
|                      |  | CCL4                | Yes                    |
|                      |  | CCL4L2              | Yes                    |
|                      |  | CCL5                | Yes                    |
|                      |  | CCL7                | Yes                    |
|                      |  | CCL8                | Yes                    |
|                      |  | CKLF                | Yes                    |
|                      |  | CX3CL1              | Yes                    |
|                      |  | CXCL1               | Yes                    |
|                      |  | CXCL10              | Yes                    |
|                      |  | CXCL11              | Yes                    |
|                      |  | CXCL16              | Yes                    |
|                      |  | CXCL2               | Yes                    |
|                      |  | CXCL3               | Yes                    |
|                      |  | CXCL5               | Yes                    |
|                      |  | CXCL6               | Yes                    |
|                      |  | CXCL8               | Yes                    |
|                      |  | CXCL9               | Yes                    |
|                      |  | XCL1                | Yes                    |
|                      |  | XCL2                | Yes                    |

**Supplementary Table S4.** Summary statistics of the CD3 and CD66b as continuous variable, p values by Shapiro-Wilk normality test

|                                  | <b>Min.</b> | <b>1st Q</b> | <b>Median</b> | <b>Mean</b> | <b>3rd Q</b> | <b>Max.</b> | <b>p</b> |
|----------------------------------|-------------|--------------|---------------|-------------|--------------|-------------|----------|
| <b>CD3 area (mm2)</b>            | 7.50        | 73.45        | 144.26        | 156.07      | 233.54       | 392.99      | 0.015    |
| <b>CD3 density (cells/mm2)</b>   | 18          | 204          | 396           | 501         | 646          | 2020        | <0.001   |
| <b>CD66b area (mm2)</b>          | 7.39        | 72.55        | 137.37        | 151.29      | 222.19       | 420.72      | 0.015    |
| <b>CD66b density (cells/mm2)</b> | 9           | 32           | 78            | 167         | 183          | 1049        | <0.001   |
